# Supplementary material for: HMGB1‐Promoted Neutrophil Extracellular Traps Contribute to Cardiac Diastolic Dysfunction in Mice
Source: PubMed Central journal article supplement — J Am Heart Assoc. 2022 Feb 12;11(4):e023800. doi: 10.1161/JAHA.121.023800 (PMC9245819; doi:10.1161/jaha.121.023800), 2022-02-12

# **SUPPLEMENTAL MATERIAL**

**Table S1. Characteristics of HFpEF patients and their age- and sex-matched controls.**

|                                          | HFpEF (n=20) | Control (n=20) |
|------------------------------------------|--------------|----------------|
| Age (yrs)                                | 66±7         | 64±5           |
| Male/female                              | 8/12         | 7/13           |
| <b>Etiology of HFpEF*</b>                |              |                |
| Ischemic                                 | 1            | 0              |
| Hypertensive/Non-ischemic/Unknown        | 19           | 0              |
| <b>Comorbidities*</b>                    |              |                |
| Obesity (BMI >28kg/m <sup>2</sup> )      | 4            | 0              |
| Hypertension                             | 16           | 0              |
| Type 2 diabetes mellitus                 | 14           | 2              |
| Atrial fibrillation/flutter              | 8            | 0              |
| Systolic blood pressure (mmHg)*          | 136±29       | 121±22         |
| Diastolic blood pressure (mmHg)*         | 80±12        | 72±9           |
| Heart rate (bpm)                         | 76±3         | 72±3           |
| QRS duration (ms)*                       | 104±20       | 95±15          |
| <b>NYHA functional class*</b>            |              |                |
| I                                        | 4            | 18             |
| II                                       | 10           | 2              |
| III                                      | 6            | 0              |
| IV                                       | 0            | 0              |
| <b>Echocardiography:</b>                 |              |                |
| LVEF (%)                                 | 55.6±5.7     | 59.2±7.2       |
| IVS (mm)*                                | 12.2±3.1     | 10.1±1.9       |
| PW (mm)*                                 | 11.6±2.8     | 9.8±1.6        |
| LVEDD (mm)                               | 46.1±5.8     | 47.2±6.3       |
| LVESD (mm)                               | 30.1±6.9     | 30.6±5.5       |
| LV mass (g)*                             | 186±45       | 156±35         |
| PA pressure (mmHg)*                      | 42±11        | 26±8.5         |
| <b>Laboratory values</b>                 |              |                |
| Cardiac TnT (mg/mL)                      | 0.03±0.03    | 0.02±0.03      |
| BNP (pg/mL)*                             | 260±51       | 30±5           |
| Creatinine (mg/dL)*                      | 1.47±0.9     | 0.89±0.5       |
| MDRD eGFR (mL/min/1.73 m <sup>2</sup> )* | 49±12        | 74±14          |
| Sodium (mmol/L)                          | 139±3.8      | 138±4.1        |
| Hemoglobin (g/dL)                        | 11.8±1.9     | 12.6±1.8       |
| Glucose (mg/dL)*                         | 146±38       | 91±19          |

LVEF: Left Ventricular Ejection Fraction; LV: Left ventricular; IVS: Intraventricular septal thickness; LVEDD: LV End Diastolic Diameter; LVESD: LV End Systolic Diameter; PW: Posterior Wall Thickness; NYHA, New York Heart Association; MDRD eGFR, glomerular filtration rate by Modification of Diet in Renal Disease equation; BNP, brain natriuretic peptide; TnT, troponin T. Grade 1 diastolic dysfunction: impaired relaxation; Grade 2 diastolic dysfunction: pseudonormal filling pattern; Grade 3 diastolic dysfunction: reversible restrictive filling pattern. \* $P < 0.05$  HFpEF vs control.

**Figure S1.** mRNA expression of Anp, Bnp, collagen 1, collagen 3 and IL-10 after HMGB1 inhibition in mice. \*P < 0.05 vs. Control; †P < 0.05 vs. HFpEF.

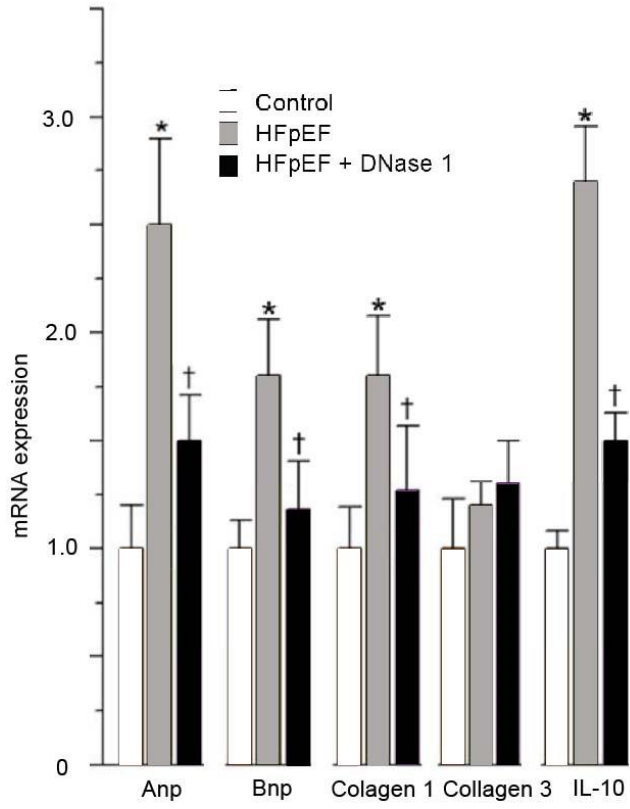

**Figure S2. Quantification of levels of cell-free DNA from cultured differentiated neutrophils of indicated treatments.**

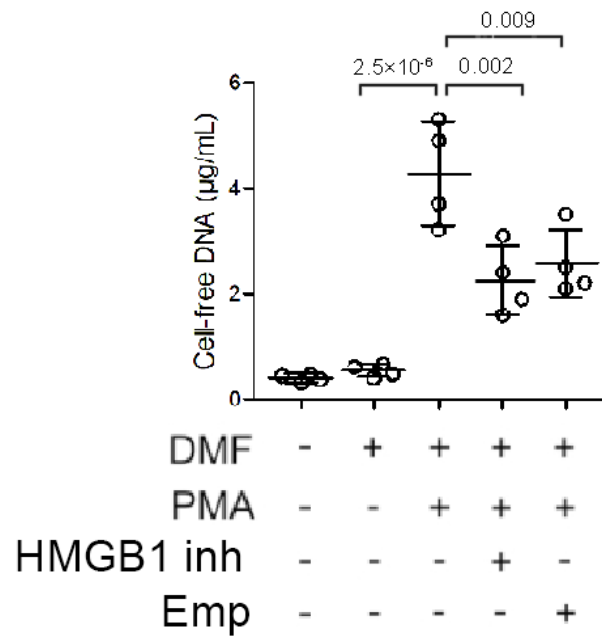

Supplement: JAH3-11-e023800-s001.pdf [file JAH3-11-e023800-s001.pdf]
